# Supplementary material for: Partitioning soil organic carbon into its centennially stable and active fractions with machine-learning models based on Rock-Eval® thermal analysis (PARTY SOC v2.0 and PARTY SOC v2.0 EU )
Source: Copernicus journal article supplement (doi:10.5194/gmd-14-3879-2021), 2021-06-24
Supplement: Supplementary file 2 [file gmd-14-3879-2021-supplement.zip]

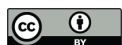

## *Supplement of*

# **Partitioning soil organic carbon into its centennially stable and active fractions with machine-learning models based on Rock-Eval<sup>®</sup> thermal analysis (PARTY<sub>SOC</sub>v2.0 and PARTY<sub>SOC</sub>v2.0<sub>EU</sub>)**

**Lauric Cécillon et al.**

*Correspondence to:* Lauric Cécillon ([lauric.cecillon@inrae.fr](mailto:lauric.cecillon@inrae.fr))

- [gmd-14-3879-2021-supplement-title-page.pdf](#)
- [supplementary\\_information](#)
  - [supp\\_info\\_partysoc\\_17april2021.pdf](#)
  - [supplementary\\_table\\_S3.csv](#)

The copyright of individual parts of the supplement might differ from the article licence.
